# Supplementary material
Source: Research Square preprint supplement (doi:10.21203/rs.3.rs-9359785/v1)

Uncropped Western Blot of Figure 2


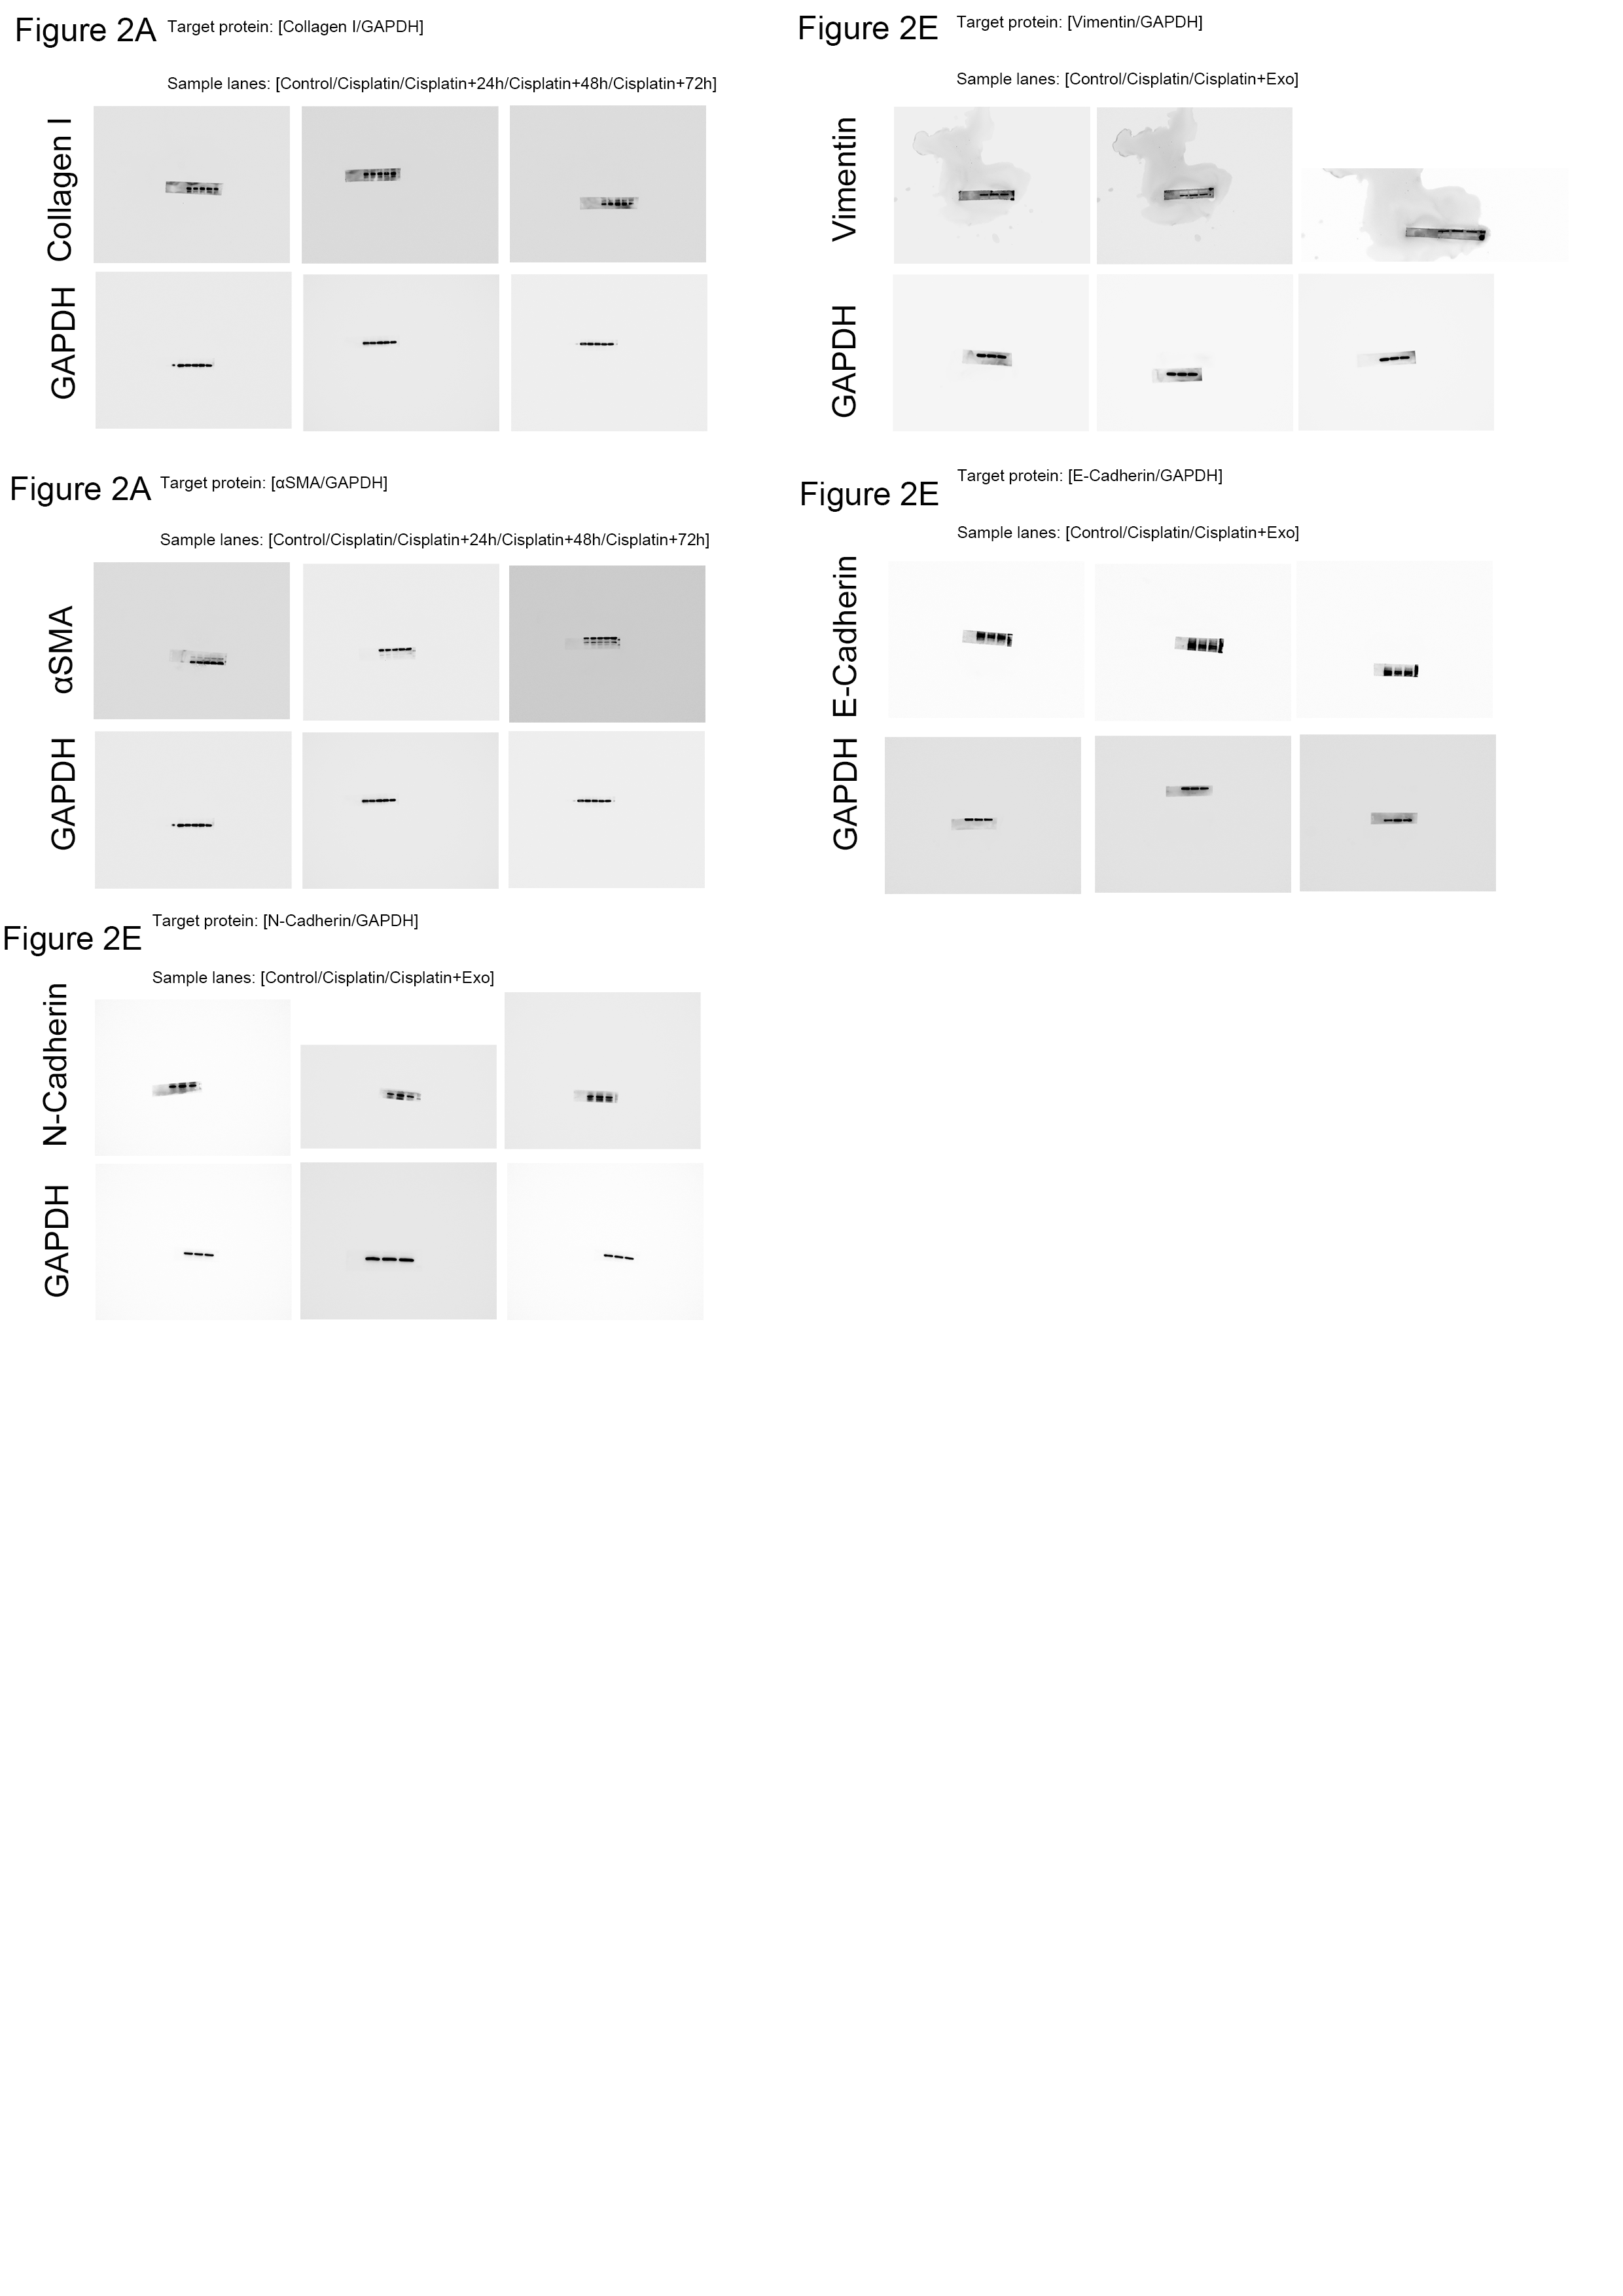


Uncropped Western Blot of Figure 3


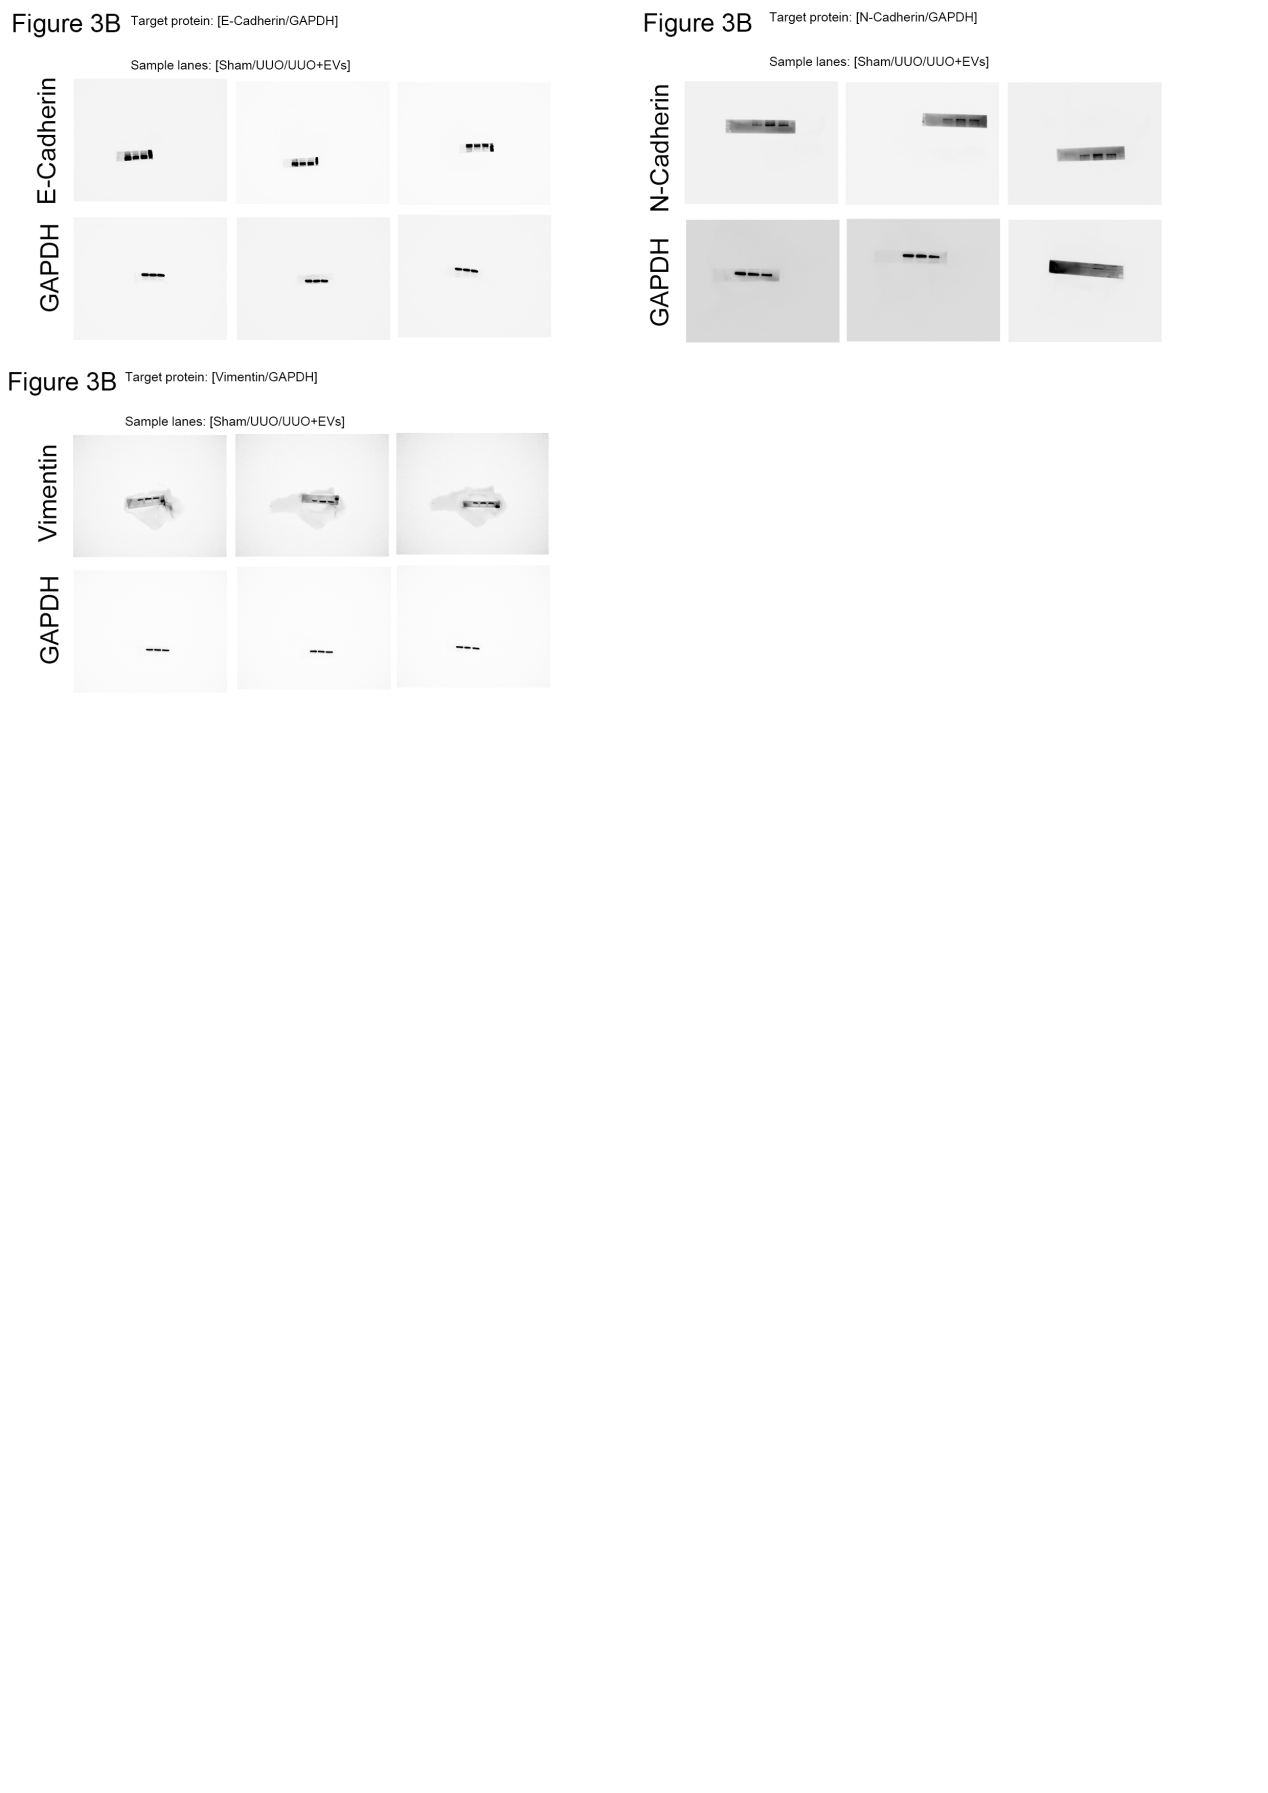


Uncropped Western Blot of Figure 4


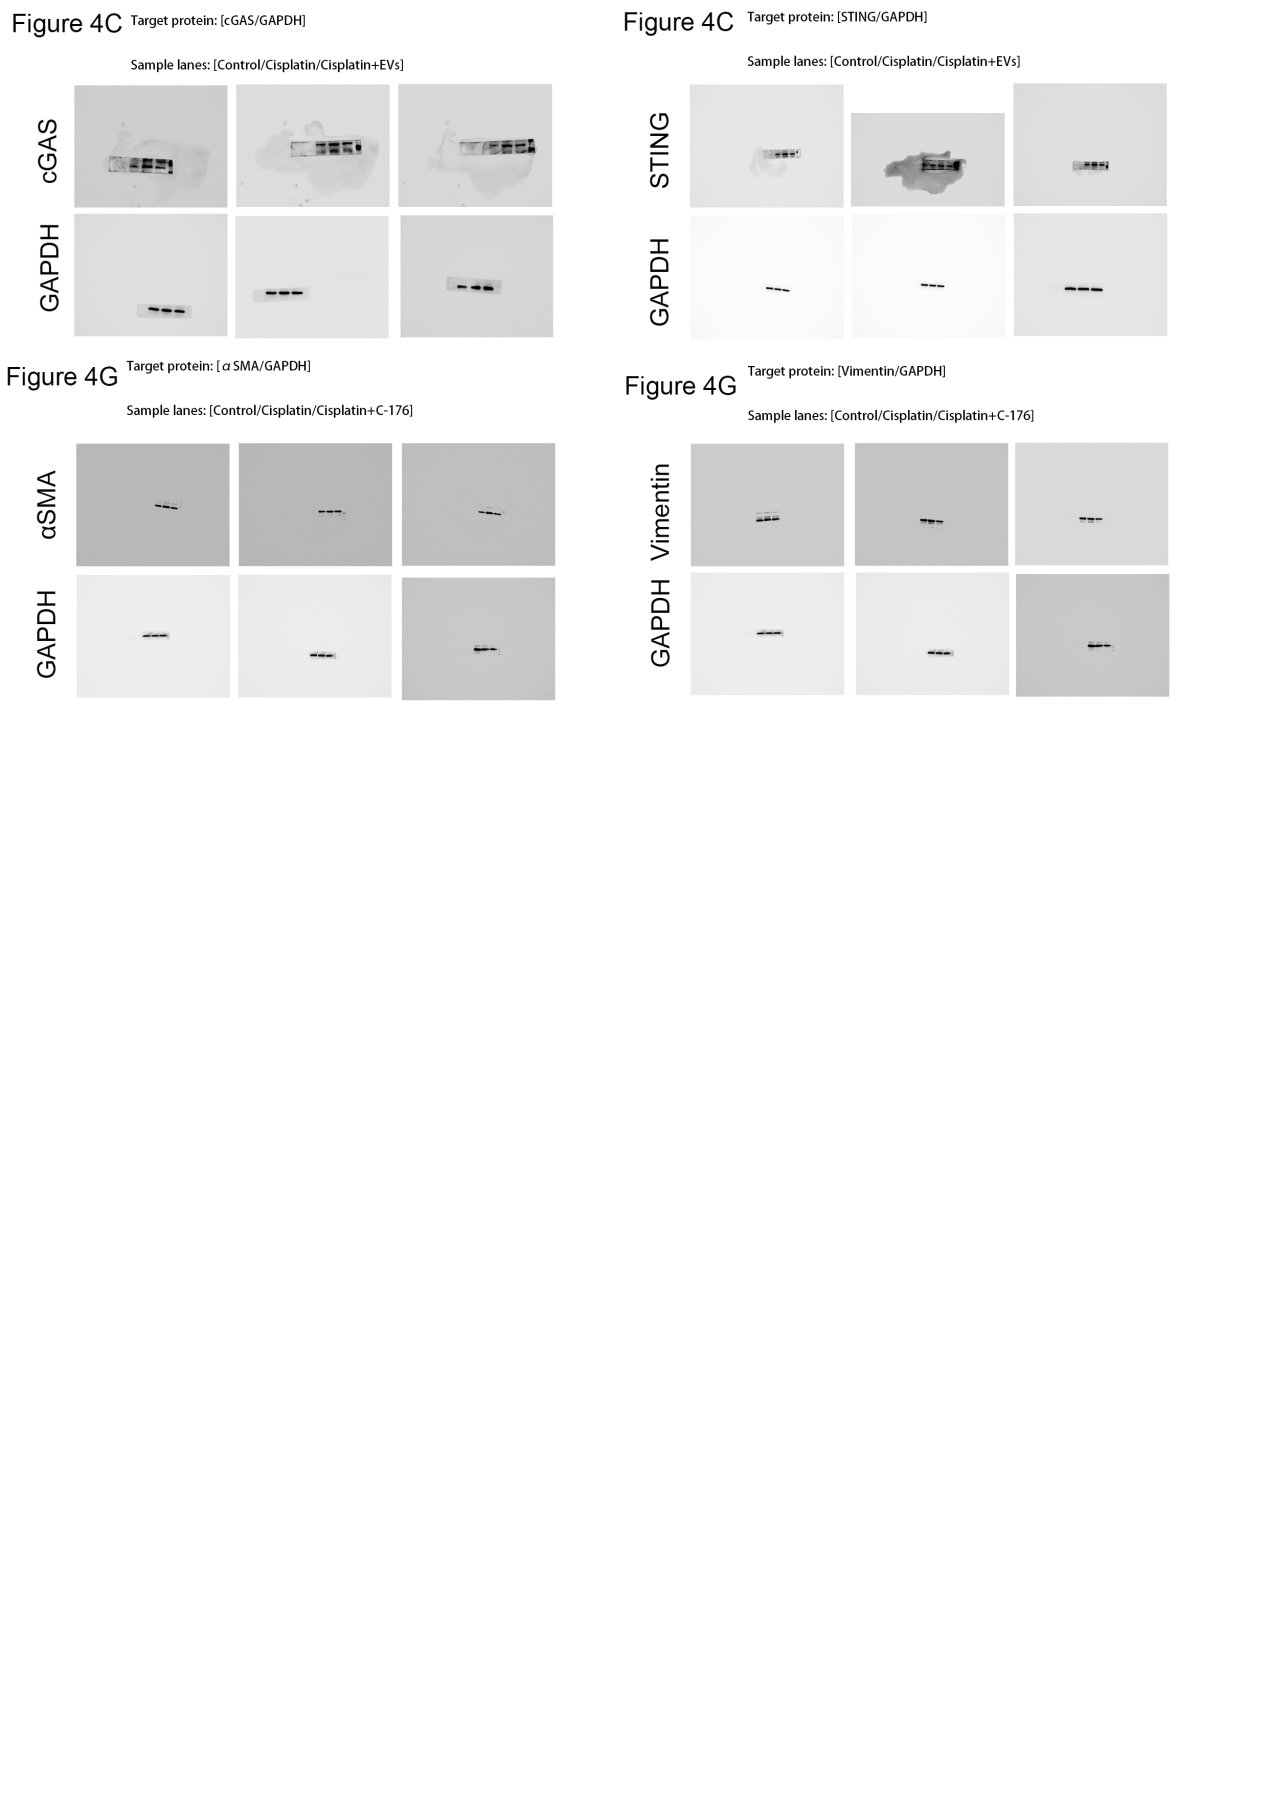


Uncropped Western Blot of Figure 5


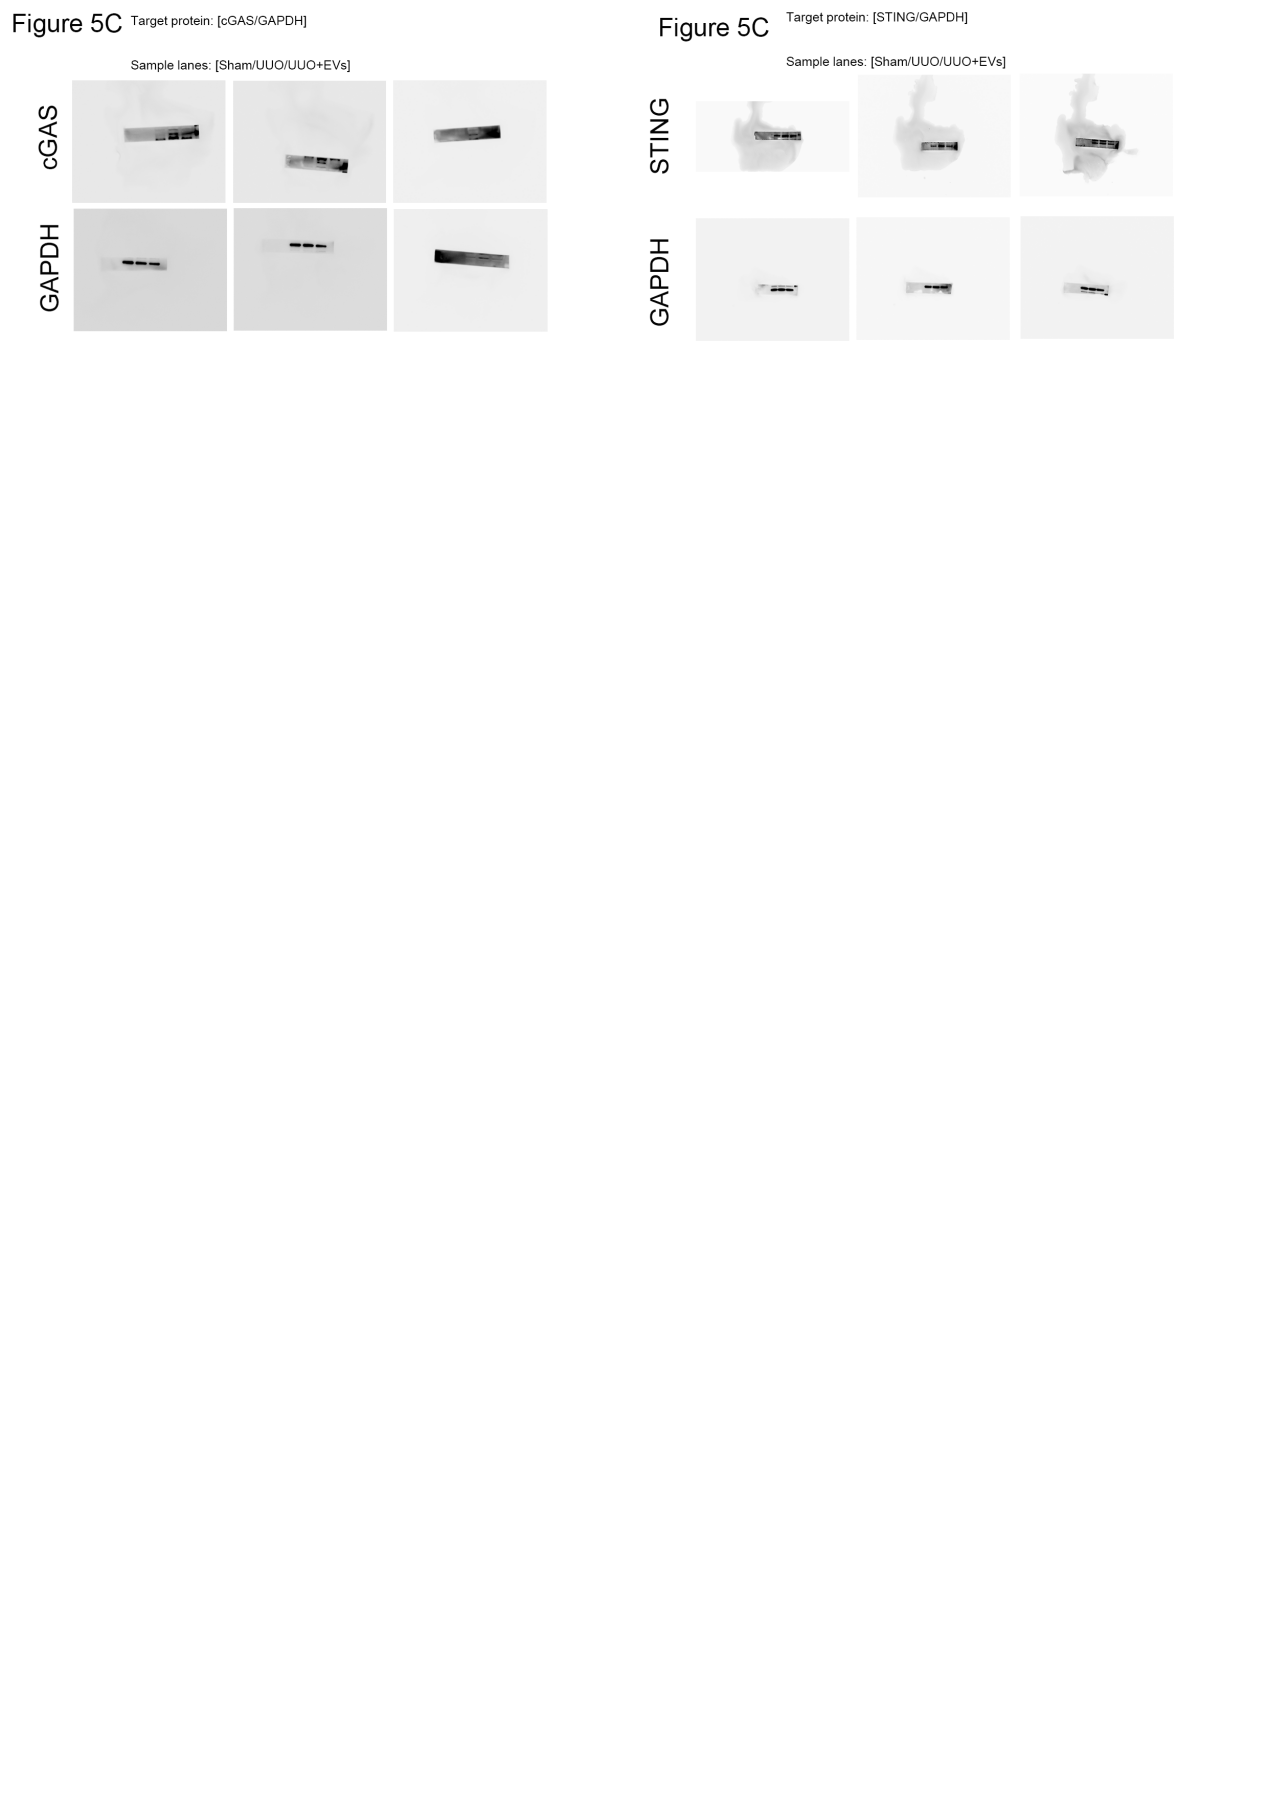


Uncropped Western Blot of Figure 6


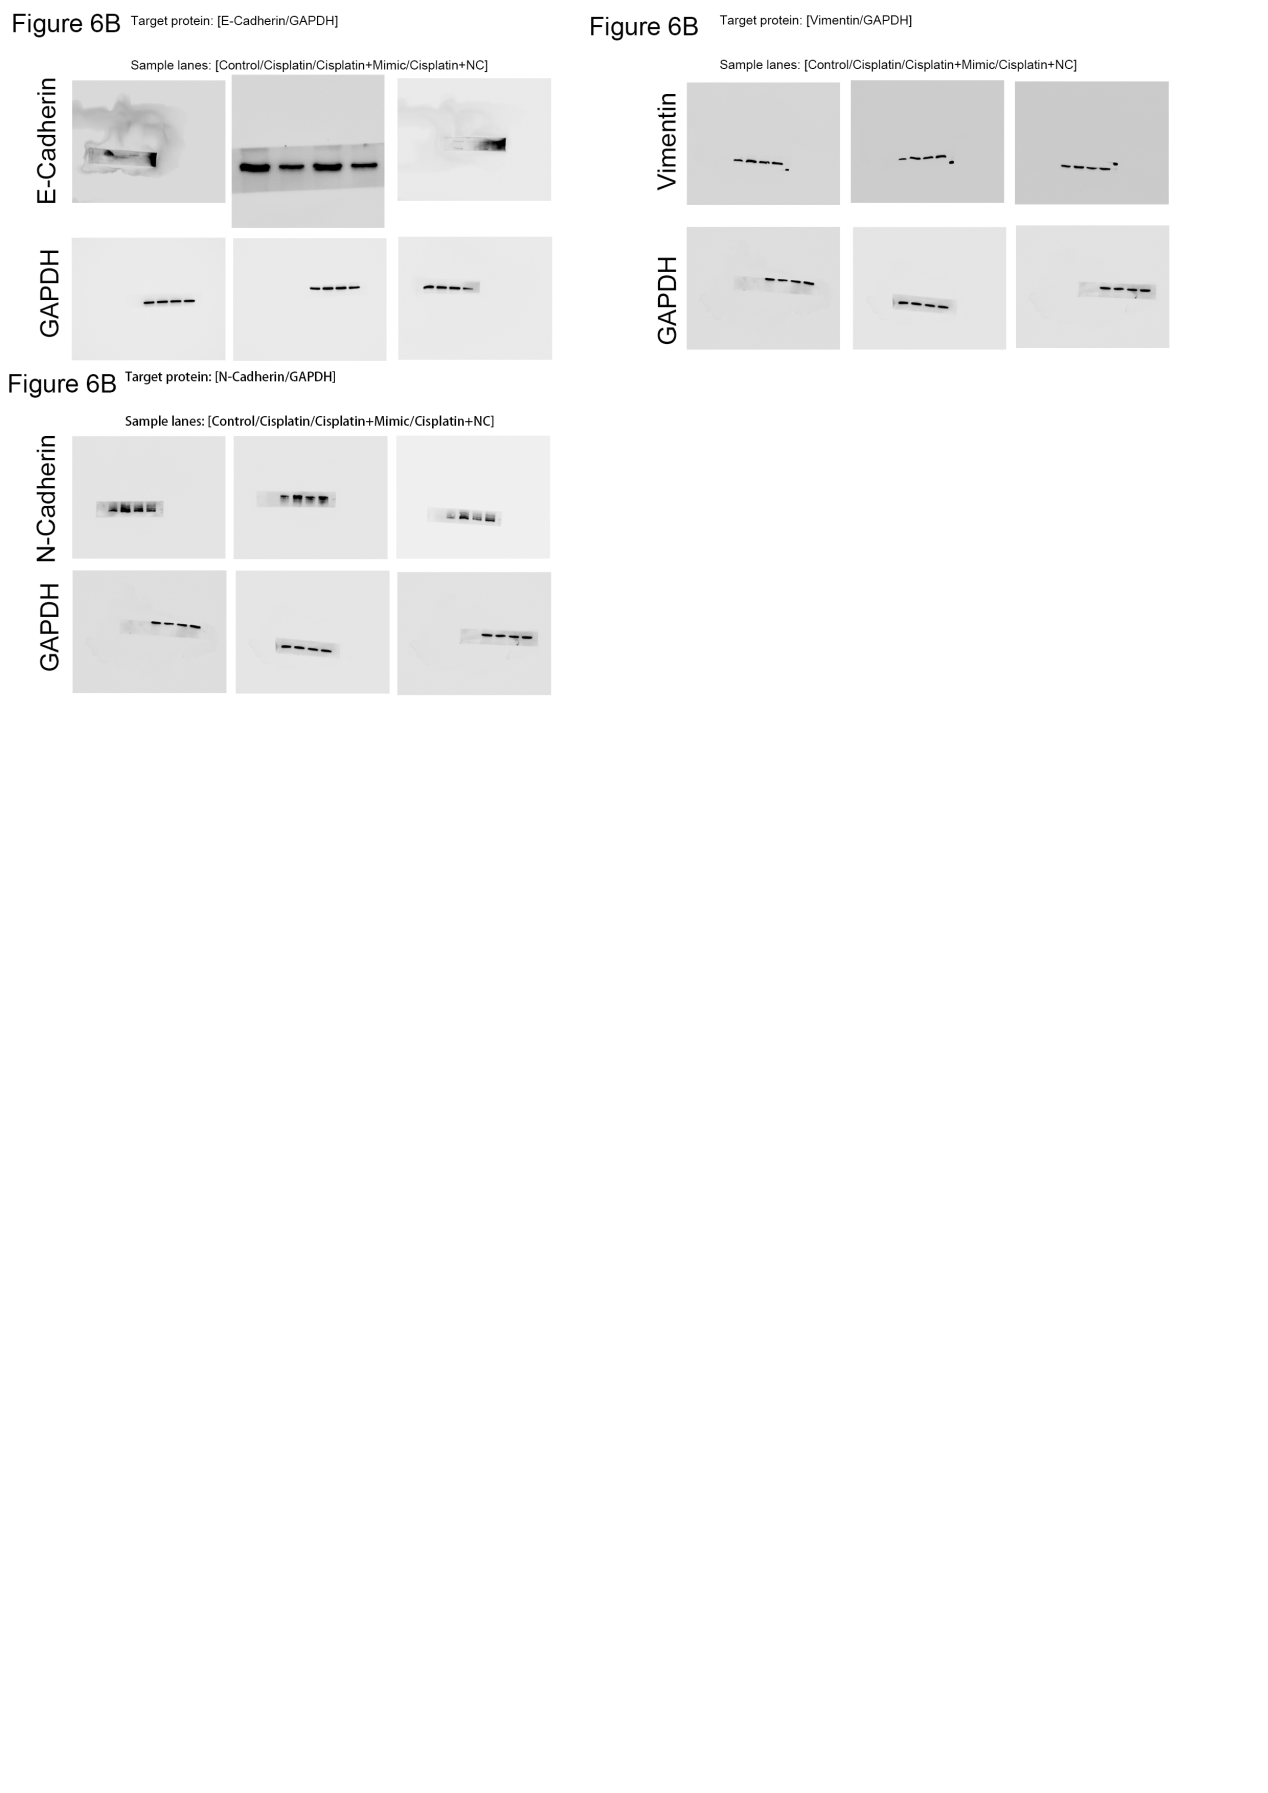


Uncropped Western Blot of Figure 7


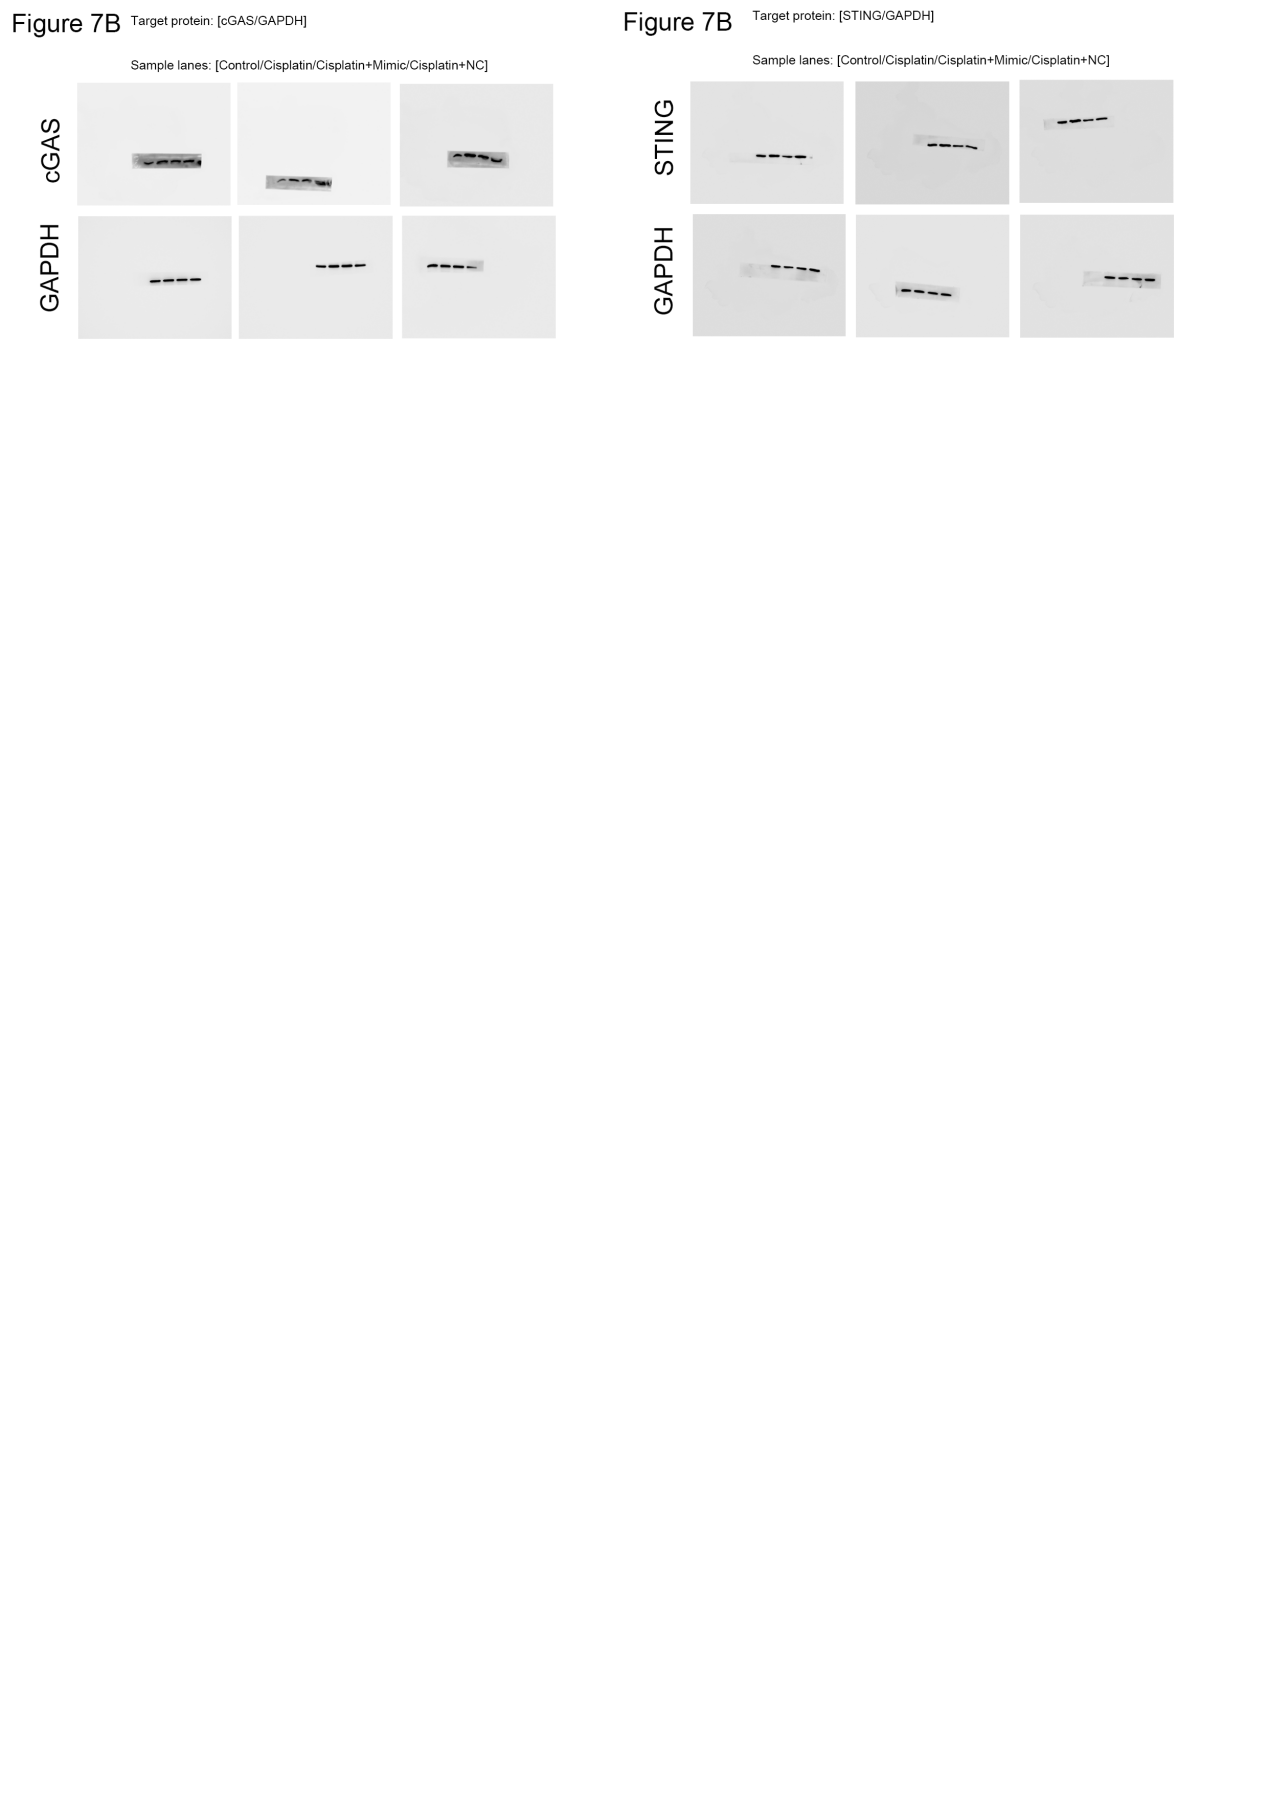

Supplement: Supplementary file 1 [file 5f02e586717da1f5f7714d27.docx]
