# Supplementary material
Source: Research Square preprint supplement (doi:10.21203/rs.3.rs-9359785/v1)
Supplement: Supplementary file 2 [file e683c23f845bde574f2f63df.docx]

**Supplementary Table S1. List of primary antibodies used in this study.**

| **Antibody** | **Catalog Number** | **Catalog Number** | **Manufacturer** |
| --- | --- | --- | --- |
| cGAS | HA500023 | Huabio | 1:500 |
| STING | A21051 | ABclonal | 1:500 |
| CD63 | A19023 | ABclonal | 1:500 |
| TSG101 | A1692 | ABclonal | 1:500 |
| Alix | A25326 | ABclonal | 1:500 |
| Calnexin | A4846 | ABclonal | 1:500 |
| α-SMA | A24146 | ABclonal | 1:500 |
| E-Cadherin | A20798 | ABclonal | 1:500 |
| N-Cadherin | A3045 | ABclonal | 1:500 |
| Vimentin | R22775 | Zenbio | 1:500 |
| Collagen Ⅰ | A21069 | ABclonal | 1:500 |
| GAPDH | P04406 | Zenbio | 1:5000 |

**Supplementary Table S2. Body weight, obstructed kidney wet weight, and kidney index in experimental mice.**

| **Group** | **Body weight (g) mean ± SD (n=6)** | **Right (obstructed) kidney wet weight (g) mean ± SD** | **Kidney index (%) mean ± SD** |
| --- | --- | --- | --- |
| Sham | 23.10 ± 0.58 | 0.122 ± 0.004 | 0.528 ± 0.018 |
| UUO | 19.65 ± 0.71 | 0.238 ± 0.009 | 1.212 ± 0.056 |
| UUO+HucMSC-EVs | 20.28 ± 0.46 | 0.196 ± 0.005 | 0.967 ± 0.031 |

**Supplementary Table S2. Body weight, obstructed kidney wet weight, and kidney index in experimental mice.**
Data are presented as mean ± SD (n = 6 mice per group). Kidney index = (obstructed kidney wet weight / body weight) × 100%. Right kidney wet weight represents the obstructed kidney in UUO groups. HucMSC-EVs treatment significantly attenuated UUO-induced kidney enlargement, as reflected by reductions in both obstructed kidney wet weight and kidney index at day 7 after UUO.
